# Supplementary material for: Association of Gulf War Illness-Related Symptoms with Military Exposures among 1990–1991 Gulf War Veterans Evaluated at the War-Related Illness and Injury Study Center (WRIISC)
Source: MDPI journal article supplement (doi:10.3390/brainsci12030321), 2022-02-27
Supplement: s1 [file s1]

**Table S1: Proportion of Gulf War Veterans reporting moderate to severe chronic symptoms, by exposure status**

|                                                                                             | Chemical Alarms/<br>MOPP4<br>(n=509) |                    | Pesticides/Insecticides/<br>Flea Collars<br>(n=393) |                    | PB pills/<br>NAPP<br>(n=385) |                    |
|---------------------------------------------------------------------------------------------|--------------------------------------|--------------------|-----------------------------------------------------|--------------------|------------------------------|--------------------|
|                                                                                             | Unexposed<br>(n=70)                  | Exposed<br>(n=439) | Unexposed<br>(n=90)                                 | Exposed<br>(n=303) | Unexposed<br>(n=80)          | Exposed<br>(n=305) |
|                                                                                             | n (%)                                | n (%)              | n (%)                                               | n (%)              | n (%)                        | n (%)              |
| <b>Neurocognitive/Mood Symptoms</b>                                                         |                                      |                    |                                                     |                    |                              |                    |
| Substantial problems concentrating                                                          | 47 (72)                              | 338 (80)           | 57 (69)                                             | 233 (80)*          | 52 (70)                      | 240 (82)*          |
| Substantial problems remembering                                                            | 51 (75)                              | 329 (77)           | 55 (65)                                             | 226 (77)*          | 56 (73)                      | 233 (80)           |
| Sensitivity to light                                                                        | 23 (34)                              | 225 (54)*          | 33 (38)                                             | 160 (56)*          | 30 (39)                      | 161 (56)*          |
| Depression                                                                                  | 38 (57)                              | 288 (69)           | 54 (62)                                             | 188 (65)           | 36 (48)                      | 204 (70)*          |
| <b>Fatigue/Sleep Symptoms</b>                                                               |                                      |                    |                                                     |                    |                              |                    |
| Sleeping problems                                                                           | 58 (87)                              | 388 (92)           | 71 (85)                                             | 268(92)            | 68(89)                       | 273(92)            |
| Unrefreshing sleep                                                                          | 59 (87)                              | 404 (95)*          | 73 (85)                                             | 276(95)*           | 68(91)                       | 280(95)            |
| Prolonged fatigue or feeling of illness<br>lasting longer than a day after mild<br>exercise | 53 (78)                              | 349 (83)           | 63 (72)                                             | 241(84)*           | 59(76)                       | 245(86)*           |
| <b>Pain Symptoms</b>                                                                        |                                      |                    |                                                     |                    |                              |                    |
| Muscle discomfort or pains/aches                                                            | 59 (89)                              | 394 (92)           | 75(87)                                              | 265 (91)           | 71(91)                       | 266 (90)           |
| Pain in joints such as elbows, knees<br>and fingers without redness and<br>swelling         | 56 (84)                              | 381 (89)           | 68 (79)                                             | 262(89)*           | 63(82)                       | 266 (90)           |
| <b>Gastrointestinal Symptoms</b>                                                            |                                      |                    |                                                     |                    |                              |                    |
| Nausea                                                                                      | 25 (38)                              | 160 (38)           | 19 (22)                                             | 103(35)*           | 21 (27)                      | 119 (41)*          |
| Diarrhea                                                                                    | 34 (50)                              | 246 (58)           | 40 (47)                                             | 177(61)*           | 39 (51)                      | 182 (62)           |
| Stomach or abdominal pain                                                                   | 37 (56)                              | 289 (68)           | 52 (61)                                             | 209(71)            | 40 (52)                      | 208 (71*)          |

Abbreviations: MOPP4 = Mission Oriented Protective Posture Level 4; PB = pyridostigmine bromide; NAPP = nerve agent pyridostigmine pretreatment.

Notes: Column percentages reported. Values with asterisk (\*) denote differences between unexposed and exposed groups for that symptom at  $p < 0.05$ .

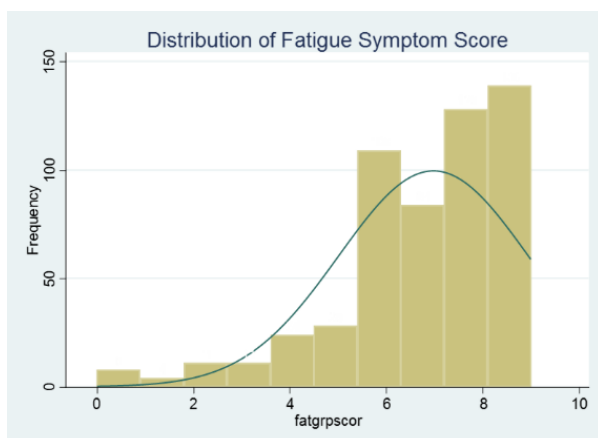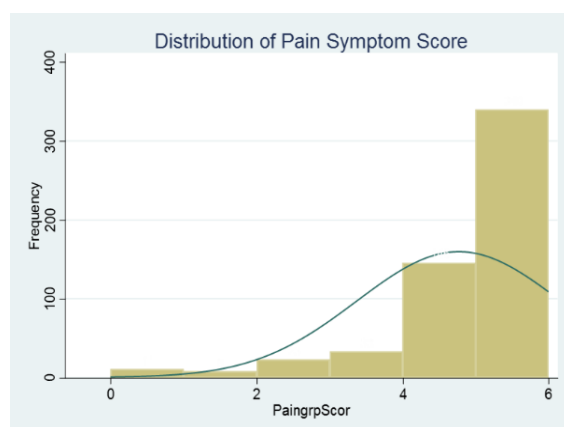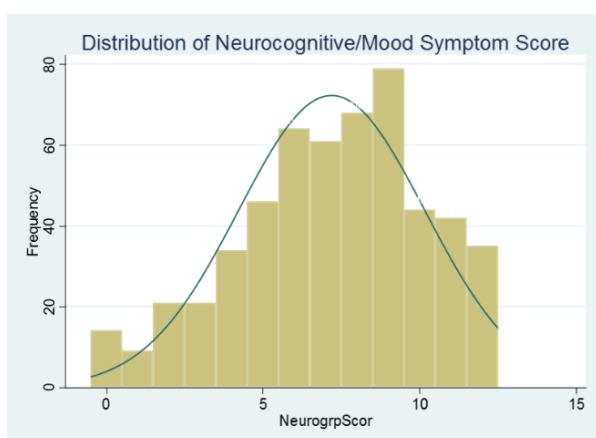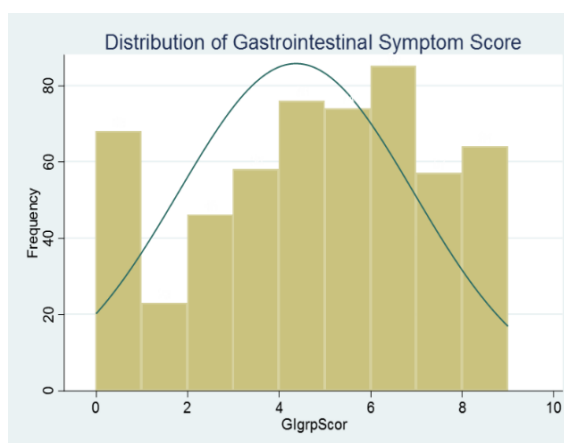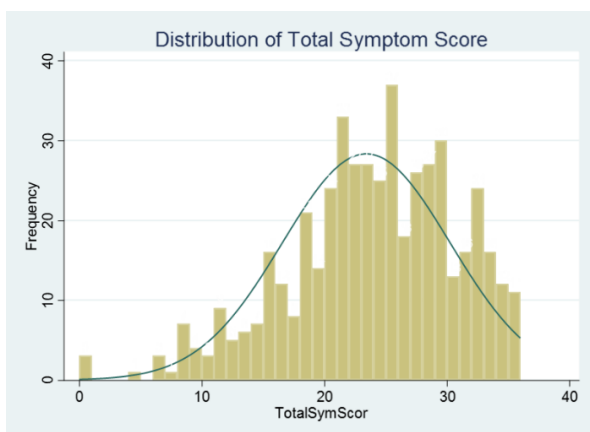

**Supplementary Figure S1. Distribution of Symptom Summary Scores in Gulf War Veterans.**
